# Supplementary material for: Reference Gene Selection for Quantitative PCR Studies in Sheep Neutrophils
Source: Int J Mol Sci. 2013 May 30;14(6):11484–95. doi: 10.3390/ijms140611484 (PMC3709743; doi:10.3390/ijms140611484)
Supplement: Supplementary file 1 [file ijms-14-11484-s001.pdf]

# Supplementary Information

**Table S1.** MIQE checklist for authors, reviewers, and editors (see reference [18]). <sup>1</sup>

|                                                                                      | IMPORTANCE     | Yes/No/NA(not applicable) |
|--------------------------------------------------------------------------------------|----------------|---------------------------|
| <b>Experimental design</b>                                                           |                |                           |
| Definition of experimental and control groups                                        | E              | Yes                       |
| Number within each group                                                             | E              | Yes                       |
| Assay carried out by the core or investigator's laboratory?                          | D              | Yes                       |
| Acknowledgment of authors' contributions                                             | D              | Yes                       |
| <b>Sample</b>                                                                        |                |                           |
| Description                                                                          | E              | Yes                       |
| Volume/mass of sample processed                                                      | D              | Yes                       |
| Microdissection or macrodissection                                                   | E              | NA                        |
| Processing procedure                                                                 | E              | Yes                       |
| If frozen, how and how quickly?                                                      | E              | Yes                       |
| If fixed, with what and how quickly?                                                 | E              | NA                        |
| Sample storage conditions and duration<br>(especially for FFPE <sup>2</sup> samples) | E              | Yes                       |
| <b>Nucleic acid extraction</b>                                                       |                |                           |
| Procedure and/or instrumentation                                                     | E              | Yes                       |
| Name of kit and details of any modifications                                         | E              | Yes                       |
| Source of additional reagents used                                                   | D              | Yes                       |
| Details of DNase or RNase treatment                                                  | E              | Yes                       |
| Contamination assessment (DNA or RNA)                                                | E              | Yes                       |
| Nucleic acid quantification                                                          | E              | Yes                       |
| Instrument and method                                                                | E              | Yes                       |
| Purity ( $A_{260}/A_{280}$ )                                                         | D              | Yes                       |
| Yield                                                                                | D              | No                        |
| RNA integrity: method/instrument                                                     | E              | No                        |
| RIN/RQI or $C_q$ of 3' and 5' transcripts                                            | E              | NA                        |
| Electrophoresis traces                                                               | D              | NA                        |
| Inhibition testing ( $C_q$ dilutions, spike, or other)                               | E              | Yes                       |
| <b>Reverse transcription</b>                                                         |                |                           |
| Complete reaction conditions                                                         | E              | Yes                       |
| Amount of RNA and reaction volume                                                    | E              | Yes                       |
| Priming oligonucleotide (if using GSP) and concentration                             | E              | NA                        |
| Reverse transcriptase and concentration                                              | E              | Yes                       |
| Temperature and time                                                                 | E              | Yes                       |
| Manufacturer of reagents and catalogue numbers                                       | D              | Yes                       |
| $C_q$ s with and without reverse transcription                                       | D <sup>3</sup> | No                        |
| Storage conditions of cDNA                                                           | D              | Yes                       |

Table S1. Cont.

|                                                             | IMPORTANCE     | Yes/No/NA(not applicable) |
|-------------------------------------------------------------|----------------|---------------------------|
| <b>qPCR target information</b>                              |                |                           |
| Gene symbol                                                 | E              | Yes                       |
| Sequence accession number                                   | E              | Yes                       |
| Location of amplicon                                        | D              | Yes                       |
| Amplicon length                                             | E              | Yes                       |
| In silico specificity screen (BLAST, and so on)             | E              | Yes                       |
| Pseudogenes, retropseudogenes, or other homologs?           | D              | NA                        |
| Sequence alignment                                          | D              | No                        |
| Secondary structure analysis of amplicon                    | D              | No                        |
| Location of each primer by exon or intron (if applicable)   | E              | Yes                       |
| What splice variants are targeted?                          | E              | NA                        |
| <b>qPCR oligonucleotides</b>                                |                |                           |
| Primer sequences                                            | E              | Yes                       |
| RTPrimerDB identification number                            | D              | No                        |
| Probe sequences                                             | D <sup>4</sup> | NA                        |
| Location and identity of any modifications                  | E              | NA                        |
| Manufacturer of oligonucleotides                            | D              | Yes                       |
| Purification method                                         | D              | Yes                       |
| <b>qPCR protocol</b>                                        |                |                           |
| Complete reaction conditions                                | E              | Yes                       |
| Reaction volume and amount of cDNA/DNA                      | E              | Yes                       |
| Primer, (probe), Mg <sup>2+</sup> , and dNTP concentrations | E              | Yes                       |
| Polymerase identity and concentration                       | E              | Yes                       |
| Buffer/kit identity and manufacturer                        | E              | Yes                       |
| Exact chemical composition of the buffer                    | D              | Yes                       |
| Additives (SYBR Green I, DMSO, and so forth)                | E              | Yes                       |
| Manufacturer of plates/tubes and catalog number             | D              | Yes                       |
| Complete thermocycling parameters                           | E              | Yes                       |
| Reaction setup (manual/robotic)                             | D              | Yes                       |
| Manufacturer of qPCR instrument                             | E              | Yes                       |
| <b>qPCR validation</b>                                      |                |                           |
| Evidence of optimization (from gradients)                   | D              | Yes                       |
| Specificity (gel, sequence, melt, or digest)                | E              | NA (see ref [11])         |
| For SYBR Green I, C <sub>q</sub> of the NTC                 | E              | Yes (not published)       |
| Calibration curves with slope and y intercept               | E              | Yes (not published)       |
| PCR efficiency calculated from slope                        | E              | Yes (not published)       |
| CIs for PCR efficiency or SE                                | D              | No                        |
| r <sup>2</sup> of calibration curve                         | E              | Yes (not published)       |
| Linear dynamic range                                        | E              | NA                        |
| C <sub>q</sub> variation at LOD                             | E              | NA                        |
| CIs throughout range                                        | D              | NA                        |
| Evidence for LOD                                            | E              | NA                        |
| If multiplex, efficiency and LOD of each assay              | E              | NA                        |

Table S1. Cont.

|                                                                          | IMPORTANCE | Yes/No/NA(not applicable) |
|--------------------------------------------------------------------------|------------|---------------------------|
| <b>Data analysis</b>                                                     |            |                           |
| qPCR analysis program (source, version)                                  | E          | Yes                       |
| Method of C <sub>q</sub> determination                                   | E          | Yes                       |
| Outlier identification and disposition                                   | E          | Yes                       |
| Results for NTCs                                                         | E          | Yes                       |
| Justification of number and choice of reference genes                    | E          | Yes                       |
| Description of normalization method                                      | E          | Yes                       |
| Number and concordance of biological replicates                          | D          | Yes                       |
| Number and stage (reverse transcription or qPCR) of technical replicates | E          | NA                        |
| Repeatability (intraassay variation)                                     | E          | Yes                       |
| Reproducibility (interassay variation, CV)                               | D          | Yes                       |
| Power analysis                                                           | D          | Yes                       |
| Statistical methods for results significance                             | E          | Yes                       |
| Software (source, version)                                               | E          | Yes                       |
| C <sub>q</sub> or raw data submission with RDML                          | D          | Yes (not published)       |

<sup>1</sup> All essential information (E) must be submitted with the manuscript. Desirable information (D) should be submitted if available. If primers are from RTPimerDB, information on qPCR target, oligonucleotides, protocols, and validation is available from that source; <sup>2</sup> FFPE, formalin-fixed, paraffin-embedded; RIN, RNA integrity number; RQI, RNA quality indicator; GSP, gene-specific priming; dNTP, deoxynucleoside triphosphate; <sup>3</sup> Assessing the absence of DNA with a no–reverse transcription assay is essential when first extracting RNA. Once the sample has been validated as DNA free, inclusion of a no–reverse transcription control is desirable but no longer essential; <sup>4</sup> Disclosure of the probe sequence is highly desirable and strongly encouraged; however, because not all vendors of commercial predesigned assays provide this information, it cannot be an essential requirement. Use of such assays is discouraged.
